# Supplementary material
Source: PubMed Central journal article supplement (PMC3457572)
Supplement: IAI.00562-12_zii999099814so1.pdf [file IAI.00562-12_zii999099814so1.pdf]

---

SUPPLEMENTAL TABLE 1. Primers used in this study

---

| Primer name       | Sequence                                                                      |
|-------------------|-------------------------------------------------------------------------------|
| F-N315coa         | CGCGGATCCATAGTAACAAAGGATTATAGTAAAGAATCAAG                                     |
| R-N315coa         | TCCCCGGGTTATTTTGTACTCTAGGCCATA                                                |
| R-MW2coa          | CGCGGATCCATAGTAACAAAGGATTATAGTGGGAAA                                          |
| R-MW2coa          | TCCCCGGGTTATTTTGTACTCTAGGCCATA                                                |
| F-M252coa         | CGCGGATCCATAGTAACTAAAGATTATAGTAAAGAATCAAGAG                                   |
| R-M252coa         | TCCCCGGGTTATTTTGTACTCTAGGACCATATGTC                                           |
| F-U300coa         | CGCGGATCCATAGTAACAAAGGATTATAGTGGGAAAT                                         |
| R-U300coa         | TCCCCGGGTTATTTTGTACTCTAGGCCATA                                                |
| F-WIScoa          | CGCGGATCCATAGTAACAAAGGATTATAGTGGGAAAT                                         |
| R-WIScoa          | TCCCCGGGTTATTTTGTACTCTAGGACCATATGTC                                           |
| F-85coa           | CGCGGATCCATAGTAACTAAAGATTATAGTAAAGAATCAAGAG                                   |
| R-85coa           | TCCCCGGGTTATTTTGTACTCTAGGACCATATGTC                                           |
| F-VUSA300FL-XhoI  | CCGCTCGAGGTGGTTTCTGGGGAGAAG                                                   |
| R-VUSA300FL-BamHI | CGGGATCCTTATTTGCCATTATATACTTTATTGATT                                          |
| F-VN315FL-XhoI    | CCGCTCGAGGTGGTTTCTGGGGAGAAG                                                   |
| R-VN315FL-BamHI   | CGGGATCCTTATTTGCCATTGTATACTTTATTG                                             |
| F-CUSA300-NcoI    | CATGCCATGGCCTAGGATAGTAACAAAGGATTATAGTGGGAAAT                                  |
| R-CUSA300-BamHI   | CGGGATCCTTATTTTGTACTCTAGGCCATA                                                |
| F-CN315-NcoI      | CATGCCATGGCTCGAGATAGTAACAAAGGATTATAGTAAAGAATC                                 |
| R-CN315-AvrII     | CCTAGGCGGACCATATTGAGAAGC                                                      |
| F-CMW2-NcoI       | CATGCCATGGCCGGGATAGTAACAAAGGATTATAGTGGGAAA                                    |
| R-CMW2-XhoI       | GGCTCGAGTTTTTTGACAGTTTTATTTTCCA                                               |
| F-CMRSA-NcoI      | CATGCCATGGCCCGGATAGTAACTAAAGATTATAGTAAAGAATCAAGAG                             |
| R-CMRSA-SacII     | TCCCCGCGGATTTTGGACGGTCTTGTTTTCCAAGATT                                         |
| F-VUSA300-NcoI    | CATGCCATGGCCTAGGGTGGTTTCTGGGGAGAAG                                            |
| R-VUSA300-BamHI   | CGGGATCCTTATTTGCCATTATATACTTTATTGATT                                          |
| F-VN315-NcoI      | CATGCCATGGCTCGAGGTGGTTTCTGGGGAGAAG                                            |
| R-VN315-AvrII     | CCTAGGTGTATTGTTAAAGTCCTTTAAATCAC                                              |
| F-His-CMRSA       | CATGCCATGGGCAGCAGCCATCATCATCATCACAGCAGCATAGTAACTAAAGATTATAGTAA<br>AGAATCAAGAG |
| F-His-VN315       | CATGCCATGGGCAGCAGCCATCATCATCATCATCACAGCAGCGTGGTTTCTGGGGAGAAG                  |
| R-USA300CoaStrep  | CGGGATCCTTACTTCTCAAATTGAGGATGAGACCATTTTGTACTCTAGGCCATA                        |
| R-USA300vwbStrep  | CGGGATCCTTACTTCTCAAATTGAGGATGAGACCATTTGCCATTATATACTTTATTGATT                  |

---
